# Supplementary material
Source: publisher site journal article supplement (https://www.dovepress.com/article/483536)
Supplement: Supplementary file 1 [file get_supplementary_file.php]

**Table S1** Clinical information for all patients with esophageal cancer

| Id | futime | fustat | Age | Gender | Grade | Stage | T | M | N |
| --- | --- | --- | --- | --- | --- | --- | --- | --- | --- |
| TCGA-2H-A9GF | 784 | 1 | unknow | MALE | unknow | Stage III | T3 | M0 | N1 |
| TCGA-2H-A9GL | 180 | 1 | unknow | MALE | unknow | Stage III | T3 | M0 | N1 |
| TCGA-2H-A9GN | 272 | 1 | unknow | MALE | unknow | Stage III | T3 | M0 | N1 |
| TCGA-IG-A3Y9 | 26 | 1 | unknow | MALE | unknow | Stage IIIA | T4 | M0 | N0 |
| TCGA-IG-A3YA | 632 | 0 | unknow | MALE | unknow | Stage IIIA | T4 | M0 | N0 |
| TCGA-IG-A3YC | 612 | 0 | unknow | MALE | unknow | Stage IIIA | T3 | M0 | N1 |
| TCGA-IG-A4P3 | 567 | 1 | unknow | MALE | unknow | Stage IIB | T2 | M0 | N1 |
| TCGA-IG-A4QS | 118 | 1 | unknow | MALE | unknow | Stage IIIB | T3 | M0 | N2 |
| TCGA-IG-A4QT | 283 | 1 | unknow | MALE | unknow | Stage IIA | T3 | M0 | N0 |
| TCGA-IG-A50L | 16 | 0 | unknow | MALE | unknow | Stage IIIA | T3 | M0 | N1 |
| TCGA-IG-A51D | 518 | 0 | unknow | MALE | unknow | Stage IIB | T1 | M0 | N1 |
| TCGA-IG-A5B8 | 24 | 1 | unknow | MALE | unknow | Stage IB | T3 | M0 | N0 |
| TCGA-IG-A6QS | 303 | 1 | unknow | MALE | unknow | Stage IIB | T2 | M0 | N1 |
| TCGA-IG-A97H | 441 | 0 | unknow | MALE | unknow | Stage IIA | T3 | M0 | NX |
| TCGA-IG-A97I | 370 | 0 | unknow | MALE | unknow | Stage IIA | T2 | M0 | N0 |
| TCGA-JY-A6FE | 112 | 1 | unknow | MALE | unknow | Stage III | T3 | M0 | N1 |
| TCGA-JY-A93C | 705 | 0 | unknow | MALE | unknow | Stage IIIB | T3 | M0 | N2 |
| TCGA-L5-A43C | 96 | 0 | unknow | MALE | unknow | unknow | unknow | unknow | unknow |
| TCGA-L5-A4OG | 143 | 0 | unknow | FEMALE | unknow | Stage I | T1 | M0 | N0 |
| TCGA-L5-A4OQ | 42 | 1 | unknow | MALE | unknow | Stage IIIA | T2 | MX | N2 |
| TCGA-L5-A4OR | 96 | 1 | unknow | MALE | unknow | Stage IA | T1 | MX | N0 |
| TCGA-L5-A4OS | 1271 | 0 | unknow | FEMALE | unknow | Stage IIB | T2 | M0 | N1 |
| TCGA-L5-A4OW | 217 | 1 | unknow | FEMALE | unknow | Stage IIB | T2 | M0 | N1 |
| TCGA-L5-A4OX | 226 | 1 | unknow | MALE | unknow | Stage IIB | T2 | M0 | N1 |
| TCGA-L5-A88S | 471 | 0 | unknow | MALE | unknow | Stage IB | T3 | MX | N0 |
| TCGA-L5-A88Y | 11 | 0 | unknow | MALE | unknow | unknow | T1 | MX | N0 |
| TCGA-L5-A88Z | 225 | 0 | unknow | FEMALE | unknow | Stage IIA | T1 | M0 | N1 |
| TCGA-L5-A893 | 92 | 0 | unknow | FEMALE | unknow | Stage I | T1 | M0 | N0 |
| TCGA-L5-A8NF | 81 | 1 | unknow | MALE | unknow | Stage IVA | T1 | M1a | N0 |
| TCGA-L5-A8NH | 393 | 1 | unknow | MALE | unknow | Stage IV | T1 | M1 | N0 |
| TCGA-L5-A8NM | 236 | 1 | unknow | FEMALE | unknow | Stage IIB | T2 | M0 | N1 |
| TCGA-L5-A8NN | 167 | 0 | unknow | MALE | unknow | Stage III | T3 | M0 | N1 |
| TCGA-L5-A8NR | 265 | 0 | unknow | FEMALE | unknow | Stage III | T3 | M0 | N1 |
| TCGA-L5-A8NS | 408 | 0 | unknow | MALE | unknow | Stage IIB | T3 | M0 | N0 |
| TCGA-L5-A8NT | 825 | 0 | unknow | MALE | unknow | Stage IIB | T3 | M0 | N0 |
| TCGA-L5-A8NV | 1599 | 1 | unknow | MALE | unknow | Stage IIA | T3 | M0 | N0 |
| TCGA-L5-A8NW | 1402 | 1 | unknow | MALE | unknow | unknow | T2 | M0 | N1 |
| TCGA-LN-A49M | 385 | 0 | unknow | MALE | unknow | Stage IIA | T2 | M0 | N0 |
| TCGA-LN-A49N | 378 | 0 | unknow | MALE | unknow | Stage IIB | T2 | M0 | N1 |
| TCGA-LN-A49O | 408 | 0 | unknow | MALE | unknow | Stage IIA | T3 | M0 | N0 |
| TCGA-LN-A49P | 375 | 0 | unknow | MALE | unknow | Stage IIA | T3 | M0 | N0 |
| TCGA-LN-A49R | 407 | 0 | unknow | MALE | unknow | Stage III | T3 | M0 | N1 |
| TCGA-LN-A49U | 467 | 0 | unknow | MALE | unknow | Stage IIA | T3 | M0 | N0 |
| TCGA-LN-A49W | 403 | 0 | unknow | MALE | unknow | Stage III | T3 | M0 | N1 |
| TCGA-LN-A49X | 384 | 0 | unknow | MALE | unknow | Stage IIA | T3 | M0 | N0 |
| TCGA-LN-A4A1 | 383 | 0 | unknow | MALE | unknow | Stage IIA | T3 | M0 | N0 |
| TCGA-LN-A4A2 | 380 | 0 | unknow | MALE | unknow | Stage IIA | T3 | M0 | N0 |
| TCGA-LN-A4A3 | 388 | 0 | unknow | MALE | unknow | Stage III | T3 | M0 | N1 |
| TCGA-LN-A4A5 | 681 | 1 | unknow | MALE | unknow | Stage IIA | T2 | M0 | N0 |
| TCGA-LN-A4A6 | 391 | 0 | unknow | MALE | unknow | Stage II | T2 | M0 | N0 |
| TCGA-LN-A4A8 | 472 | 0 | unknow | MALE | unknow | Stage IIA | T2 | M0 | N0 |
| TCGA-LN-A4A9 | 351 | 1 | unknow | MALE | unknow | Stage IIA | T2 | M0 | N0 |
| TCGA-LN-A5U6 | 375 | 0 | unknow | MALE | unknow | Stage IIB | T2 | M0 | N1 |
| TCGA-LN-A5U7 | 768 | 0 | unknow | MALE | unknow | Stage IIA | T2 | M0 | N0 |
| TCGA-LN-A7HW | 365 | 0 | unknow | MALE | unknow | Stage IIA | T2 | M0 | N0 |
| TCGA-LN-A7HX | 372 | 0 | unknow | MALE | unknow | Stage IIA | T2 | M0 | N0 |
| TCGA-LN-A7HY | 366 | 0 | unknow | MALE | unknow | Stage III | T3 | M0 | N1 |
| TCGA-LN-A7HZ | 401 | 0 | unknow | MALE | unknow | Stage IIA | T2 | M0 | N0 |
| TCGA-LN-A9FO | 4 | 0 | unknow | MALE | unknow | Stage IIA | T2 | M0 | N0 |
| TCGA-LN-A9FQ | 391 | 0 | unknow | MALE | unknow | Stage IIA | T3 | M0 | N0 |
| TCGA-LN-A9FR | 373 | 0 | unknow | MALE | unknow | Stage IIB | T2 | M0 | N1 |
| TCGA-M9-A5M8 | 1007 | 0 | unknow | MALE | unknow | Stage IIA | T3 | M0 | N0 |
| TCGA-Q9-A6FU | 157 | 1 | unknow | FEMALE | unknow | Stage IIIB | T3 | M0 | N2 |
| TCGA-Q9-A6FW | 238 | 0 | unknow | MALE | unknow | Stage IIIB | T3 | M0 | N2 |
| TCGA-R6-A6DQ | 231 | 1 | unknow | FEMALE | unknow | unknow | unknow | unknow | unknow |
| TCGA-R6-A6Y0 | 1641 | 0 | unknow | MALE | unknow | unknow | unknow | unknow | unknow |
| TCGA-R6-A6Y2 | 283 | 1 | unknow | MALE | unknow | unknow | unknow | unknow | unknow |
| TCGA-R6-A8W5 | 480 | 1 | unknow | MALE | unknow | Stage IVA | T3 | M1a | N1 |
| TCGA-R6-A8W8 | 88 | 1 | unknow | MALE | unknow | unknow | unknow | unknow | unknow |
| TCGA-R6-A8WG | 386 | 1 | unknow | MALE | unknow | unknow | unknow | unknow | unknow |
| TCGA-RE-A7BO | 213 | 1 | unknow | FEMALE | unknow | Stage IIB | T1 | M0 | N1 |
| TCGA-S8-A6BV | 609 | 0 | unknow | MALE | unknow | Stage IIIA | T3 | MX | N1 |
| TCGA-V5-A7RB | 161 | 1 | unknow | MALE | unknow | unknow | T0 | MX | N1 |
| TCGA-V5-A7RC | 104 | 1 | unknow | MALE | unknow | unknow | unknow | unknow | unknow |
| TCGA-V5-AASW | 282 | 0 | unknow | MALE | unknow | unknow | unknow | unknow | unknow |
| TCGA-V5-AASX | 273 | 0 | unknow | MALE | unknow | unknow | unknow | unknow | unknow |
| TCGA-VR-A8EQ | 694 | 1 | unknow | MALE | unknow | Stage III | T3 | M0 | N1 |
| TCGA-VR-A8ER | 378 | 1 | unknow | MALE | unknow | Stage III | T4 | M0 | N1 |
| TCGA-VR-A8ET | 47 | 1 | unknow | MALE | unknow | Stage IIA | T2 | M0 | N0 |
| TCGA-VR-A8EU | 557 | 1 | unknow | MALE | unknow | Stage IV | T1 | M1 | N1 |
| TCGA-VR-A8EW | 247 | 1 | unknow | MALE | unknow | Stage IIIB | T3 | M0 | N2 |
| TCGA-VR-A8EY | 1025 | 0 | unknow | FEMALE | unknow | Stage IIA | T3 | M0 | N0 |
| TCGA-VR-A8Q7 | 1590 | 0 | unknow | MALE | unknow | Stage IIIA | T3 | M0 | N1 |
| TCGA-VR-AA4G | 549 | 0 | unknow | FEMALE | unknow | Stage IIIA | T2 | M0 | N2 |
| TCGA-VR-AA7B | 342 | 0 | unknow | FEMALE | unknow | Stage IV | T3 | M1 | N3 |
| TCGA-VR-AA7D | 279 | 1 | unknow | MALE | unknow | Stage IIIC | T3 | M0 | N3 |
| TCGA-VR-AA7I | 484 | 1 | unknow | MALE | unknow | Stage III | T4 | M0 | N0 |
| TCGA-Z6-A8JD | 104 | 0 | unknow | MALE | unknow | Stage IIB | T3 | M0 | N0 |
| TCGA-Z6-A8JE | 64 | 0 | unknow | MALE | unknow | Stage IIIA | T3 | M0 | N1 |
| TCGA-Z6-AAPN | 81 | 0 | unknow | MALE | unknow | Stage IIA | T3 | M0 | N0 |
| TCGA-ZR-A9CJ | 600 | 1 | unknow | MALE | unknow | Stage IIIC | T3 | MX | N3 |
| TCGA-2H-A9GG | 610 | 1 | unknow | MALE | unknow | Stage III | T3 | M0 | N1 |
| TCGA-2H-A9GH | 951 | 1 | unknow | MALE | unknow | Stage IIB | T1 | M0 | N1 |
| TCGA-2H-A9GI | 435 | 1 | unknow | MALE | unknow | Stage III | T3 | M0 | N1 |
| TCGA-2H-A9GJ | 1781 | 1 | unknow | MALE | unknow | Stage I | T1 | M0 | N0 |
| TCGA-2H-A9GK | 232 | 1 | unknow | MALE | unknow | Stage III | T3 | M0 | N1 |
| TCGA-2H-A9GM | 424 | 1 | unknow | MALE | unknow | Stage IIB | T1 | M0 | N1 |
| TCGA-2H-A9GO | 494 | 1 | unknow | MALE | unknow | Stage IVA | T3 | M1a | N1 |
| TCGA-2H-A9GQ | 128 | 1 | unknow | MALE | unknow | Stage III | T3 | M0 | N1 |
| TCGA-2H-A9GR | 987 | 1 | unknow | MALE | unknow | Stage IIA | T3 | M0 | N0 |
| TCGA-IC-A6RE | 234 | 0 | unknow | MALE | unknow | Stage IIB | T1 | M0 | N1 |
| TCGA-IC-A6RF | 477 | 0 | unknow | FEMALE | unknow | Stage IA | T1 | M0 | N0 |
| TCGA-IG-A3I8 | 1012 | 0 | unknow | FEMALE | unknow | Stage IIA | T3 | M0 | N0 |
| TCGA-IG-A3QL | 1071 | 0 | unknow | MALE | unknow | Stage IIA | T2 | M0 | N0 |
| TCGA-IG-A3YB | 80 | 0 | unknow | MALE | unknow | Stage IIIA | T3 | M0 | N1 |
| TCGA-IG-A5S3 | 712 | 0 | unknow | FEMALE | unknow | Stage IIB | T3 | M0 | N0 |
| TCGA-IG-A625 | 390 | 1 | unknow | MALE | unknow | Stage IIIB | T3 | M0 | N2 |
| TCGA-IG-A7DP | 452 | 0 | unknow | FEMALE | unknow | Stage IIIA | T4a | MX | NX |
| TCGA-IG-A8O2 | 142 | 1 | unknow | MALE | unknow | Stage IIIB | T3 | M0 | N2 |
| TCGA-JY-A6F8 | 3714 | 0 | unknow | MALE | unknow | Stage I | T1 | M0 | N0 |
| TCGA-JY-A6FA | 1361 | 1 | unknow | MALE | unknow | Stage IIB | T2 | M0 | N1 |
| TCGA-JY-A6FB | 1837 | 0 | unknow | MALE | unknow | Stage I | T1 | M0 | N0 |
| TCGA-JY-A6FD | 2069 | 0 | unknow | FEMALE | unknow | Stage IIA | T3 | M0 | N0 |
| TCGA-JY-A6FH | 1441 | 0 | unknow | MALE | unknow | Stage IIB | T2 | M0 | N1 |
| TCGA-JY-A939 | 660 | 0 | unknow | MALE | unknow | Stage IIB | T1 | M0 | N1 |
| TCGA-JY-A93D | 960 | 1 | unknow | MALE | unknow | Stage IIIC | T2 | M0 | N3 |
| TCGA-JY-A93E | 767 | 0 | unknow | MALE | unknow | Stage IIIA | T3 | M0 | N1 |
| TCGA-JY-A93F | 731 | 0 | unknow | FEMALE | unknow | Stage IB | T2 | M0 | N0 |
| TCGA-KH-A6WC | 191 | 0 | unknow | MALE | unknow | Stage IA | T1 | M0 | N0 |
| TCGA-L5-A43E | 920 | 0 | unknow | MALE | unknow | Stage I | T1 | M0 | N0 |
| TCGA-L5-A43H | 9 | 1 | unknow | MALE | unknow | Stage III | T3 | M0 | N1 |
| TCGA-L5-A43I | 556 | 1 | unknow | MALE | unknow | Stage IIIA | T3 | MX | N1 |
| TCGA-L5-A43J | 0 | 1 | unknow | MALE | unknow | Stage IIB | T3 | MX | N0 |
| TCGA-L5-A43M | 272 | 0 | unknow | FEMALE | unknow | unknow | T3 | MX | N2 |
| TCGA-L5-A4OE | 730 | 1 | unknow | MALE | unknow | Stage IIIB | T3 | unknow | N2 |
| TCGA-L5-A4OF | 801 | 1 | unknow | MALE | unknow | Stage IIB | T1 | unknow | N1 |
| TCGA-L5-A4OH | 992 | 0 | unknow | MALE | unknow | Stage I | T1 | M0 | N0 |
| TCGA-L5-A4OI | 608 | 0 | unknow | MALE | unknow | Stage IIIC | T3 | MX | N3 |
| TCGA-L5-A4OJ | 639 | 0 | unknow | FEMALE | unknow | Stage I | T1 | M0 | N0 |
| TCGA-L5-A4OM | 1458 | 1 | unknow | FEMALE | unknow | Stage IA | T1 | unknow | N0 |
| TCGA-L5-A4ON | 558 | 1 | unknow | MALE | unknow | Stage IIB | T1 | unknow | N1 |
| TCGA-L5-A4OO | 101 | 0 | unknow | MALE | unknow | Stage IIIC | T3 | M0 | N3 |
| TCGA-L5-A4OP | 218 | 0 | unknow | FEMALE | unknow | Stage IA | T1 | MX | N0 |
| TCGA-L5-A4OT | 149 | 1 | unknow | MALE | unknow | Stage IV | T3 | M1a | N1 |
| TCGA-L5-A4OU | 882 | 0 | unknow | MALE | unknow | Stage IIA | T3 | M0 | N0 |
| TCGA-L5-A88T | 694 | 0 | unknow | MALE | unknow | Stage IIB | T2 | M0 | N1 |
| TCGA-L5-A88V | 79 | 0 | unknow | MALE | unknow | Stage III | T3 | MX | N1 |
| TCGA-L5-A88W | 764 | 1 | unknow | MALE | unknow | Stage IIA | T3 | MX | N0 |
| TCGA-L5-A891 | 114 | 0 | unknow | MALE | unknow | unknow | T3 | M0 | N1 |
| TCGA-L5-A8NE | 1688 | 0 | unknow | MALE | unknow | Stage IIB | T2 | M0 | N1 |
| TCGA-L5-A8NG | 1094 | 0 | unknow | MALE | unknow | Stage III | T3 | M0 | N1 |
| TCGA-L5-A8NI | 410 | 1 | unknow | MALE | unknow | Stage III | T3 | M0 | N1 |
| TCGA-L5-A8NJ | 501 | 0 | unknow | MALE | unknow | Stage III | T3 | M0 | N1 |
| TCGA-L5-A8NK | 412 | 0 | unknow | FEMALE | unknow | Stage IIA | T3 | M0 | N0 |
| TCGA-L5-A8NL | 402 | 0 | unknow | MALE | unknow | Stage III | T3 | M0 | N1 |
| TCGA-L5-A8NQ | 650 | 1 | unknow | MALE | unknow | Stage IIA | T2 | M0 | N0 |
| TCGA-L5-A8NU | 2134 | 1 | unknow | MALE | unknow | Stage IIA | T2 | M0 | N0 |
| TCGA-L7-A56G | 330 | 1 | unknow | MALE | unknow | unknow | unknow | unknow | unknow |
| TCGA-L7-A6VZ | 315 | 0 | unknow | MALE | unknow | Stage IIIC | T3 | MX | N3 |
| TCGA-LN-A49K | 180 | 1 | unknow | MALE | unknow | Stage IIA | T3 | M0 | N0 |
| TCGA-LN-A49L | 318 | 1 | unknow | MALE | unknow | Stage IIA | T2 | M0 | N0 |
| TCGA-LN-A49S | 400 | 0 | unknow | MALE | unknow | Stage IIA | T3 | M0 | N0 |
| TCGA-LN-A49V | 383 | 0 | unknow | MALE | unknow | Stage IIA | T3 | M0 | N0 |
| TCGA-LN-A49Y | 379 | 0 | unknow | MALE | unknow | Stage IIA | T3 | M0 | N0 |
| TCGA-LN-A4A4 | 383 | 0 | unknow | MALE | unknow | Stage III | T3 | M0 | N1 |
| TCGA-LN-A4MQ | 375 | 0 | unknow | MALE | unknow | Stage III | T3 | M0 | N1 |
| TCGA-LN-A4MR | 402 | 0 | unknow | MALE | unknow | Stage IIA | T2 | M0 | N0 |
| TCGA-LN-A5U5 | 136 | 1 | unknow | MALE | unknow | Stage IV | T3 | M1 | N1 |
| TCGA-LN-A7HV | 320 | 0 | unknow | MALE | unknow | Stage IIA | T2 | M0 | N0 |
| TCGA-LN-A8HZ | 375 | 0 | unknow | MALE | unknow | Stage IIA | T2 | M0 | N0 |
| TCGA-LN-A8I0 | 407 | 0 | unknow | MALE | unknow | Stage IIA | T2 | M0 | N0 |
| TCGA-LN-A8I1 | 401 | 0 | unknow | FEMALE | unknow | Stage IIA | T2 | M0 | N0 |
| TCGA-LN-A9FP | 366 | 0 | unknow | FEMALE | unknow | Stage IIA | T2 | M0 | N0 |
| TCGA-R6-A6DN | 243 | 1 | unknow | MALE | unknow | unknow | unknow | unknow | unknow |
| TCGA-R6-A6KZ | 154 | 1 | unknow | MALE | unknow | unknow | unknow | unknow | unknow |
| TCGA-R6-A6L4 | 496 | 1 | unknow | MALE | unknow | unknow | unknow | unknow | unknow |
| TCGA-R6-A6L6 | 214 | 1 | unknow | MALE | unknow | unknow | unknow | unknow | unknow |
| TCGA-R6-A6XG | 1168 | 0 | unknow | MALE | unknow | unknow | unknow | unknow | unknow |
| TCGA-R6-A6XQ | 193 | 1 | unknow | MALE | unknow | unknow | unknow | unknow | unknow |
| TCGA-R6-A8WC | 70 | 0 | unknow | MALE | unknow | unknow | unknow | unknow | unknow |
| TCGA-S8-A6BW | 620 | 0 | unknow | MALE | unknow | Stage IB | T2 | MX | N0 |
| TCGA-V5-A7RE | 500 | 0 | unknow | MALE | unknow | Stage IB | T1 | M0 | N0 |
| TCGA-V5-AASV | 467 | 0 | unknow | MALE | unknow | Stage IIB | T3 | MX | N0 |
| TCGA-VR-A8EO | 785 | 0 | unknow | MALE | unknow | Stage IIA | T3 | M0 | N0 |
| TCGA-VR-A8EP | 824 | 0 | unknow | MALE | unknow | Stage IIIB | T3 | M0 | N2 |
| TCGA-VR-A8EX | 855 | 1 | unknow | MALE | unknow | Stage IVA | T1 | M1a | N1 |
| TCGA-VR-A8EZ | 553 | 1 | unknow | MALE | unknow | Stage IIIC | T3 | M0 | N3 |
| TCGA-VR-AA4D | 1405 | 1 | unknow | MALE | unknow | Stage IIB | T1 | M0 | N1 |
| TCGA-X8-AAAR | 554 | 0 | unknow | MALE | unknow | unknow | T1 | unknow | N1 |
| TCGA-XP-A8T6 | 763 | 1 | unknow | MALE | unknow | Stage IIB | T2 | M0 | N1 |
| TCGA-XP-A8T8 | 437 | 0 | unknow | MALE | unknow | Stage IIB | T1 | M0 | N1 |
| TCGA-Z6-A9VB | 40 | 0 | unknow | MALE | unknow | Stage IIIA | T3 | M0 | N1 |

**Table S2** Intersection of the differentially expressed genes obtained from GSE5364 and GSE17351

| **Gene** | **Type** | **Gene** | **Type** | **Gene** | **Type** | **Gene** | **Type** |
| --- | --- | --- | --- | --- | --- | --- | --- |
| MYBL2 | up | SLC6A1 | down | CDCA3 | up | TRIP10 | down |
| LAMB3 | up | CRISP3 | down | ATAD2 | up | ADH1B | down |
| CKS1B | up | CAB39L | down | HOMER3 | up | PIM1 | down |
| MMP13 | up | SIM2 | down | CLPB | up | MAL | down |
| UBE2C | up | KAT2B | down | NCAPH | up | KANK1 | down |
| MMP10 | up | ROR1 | down | NUDT1 | up | GPX3 | down |
| DSCC1 | up | EDN3 | down | HOXA10 | up | TCF21 | down |
| CDC25B | up | UBL3 | down | CCNF | up | EPHX2 | down |
| CENPN | up | CPEB3 | down | KIF4A | up | CAPN5 | down |
| BID | up | TFAP2B | down | TOP2A | up | EPB41L3 | down |
| KIF14 | up | PTN | down | AURKA | up | GPD1L | down |
| CDC20 | up | CYP4F12 | down | RAD51AP1 | up | CRNN | down |
| DNMT3B | up | GAB2 | down | NUDT11 | up | CITED2 | down |
| TPX2 | up | COBL | down | FOXM1 | up | SLC27A6 | down |
| MMP11 | up | NDRG2 | down | TFRC | up | ECM1 | down |
| NELL2 | up | ABLIM3 | down | HLTF | up | PMM1 | down |
| PLAU | up | KCNAB1 | down | ITGA6 | up | ENDOU | down |
| LRRC8D | up | SCNN1B | down | KIF18B | up | GSN | down |
| BGN | up | VLDLR | down | RFC4 | up | CLCA4 | down |
| RUVBL1 | up | SASH1 | down | MAD2L1 | up | CCNG2 | down |
| ARPC1B | up | NUCB2 | down | COL10A1 | up | OBFC1 | down |
| KIF18A | up | RRAGD | down | LMNB1 | up | CBR3 | down |
| MEST | up | EMP1 | down | TTK | up | OGN | down |
| EXO1 | up | AHNAK | down | LAMC2 | up | FAM63A | down |
| TRIP13 | up | SORT1 | down | MFHAS1 | up | ANXA9 | down |
| MCM2 | up | C2orf54 | down | POLD1 | up | PSCA | down |
| COL11A1 | up | ZNF365 | down | MTERF3 | up | MEIS1 | down |
| SERPINH1 | up | CYP11A1 | down | HJURP | up | HPGD | down |
| FZD2 | up | ABLIM1 | down | KIF23 | up | BEX4 | down |
| UBE2S | up | CYP3A5 | down | HMGB3P1 | up | TLR3 | down |
| PTK7 | up | CPPED1 | down | MARCKSL1 | up | TMEM35 | down |
| TAF1A | up | CFD | down | ATP13A2 | up | MAPT | down |
| ERCC6L | up | PDZRN3 | down | CST4 | up | GREM2 | down |
| C1orf112 | up | SPAG16 | down | IGF2BP2 | up | FAM107A | down |
| MFAP2 | up | BBOX1 | down | ENPEP | up | PTGS1 | down |
| ELF4 | up | MGLL | down | MINPP1 | up | PADI1 | down |
| APMAP | up | SPINK5 | down | APOC1 | up | EPB41L4A | down |
| AGRN | up | CAST | down | MCM10 | up | FCER1A | down |
| SPAG5 | up | FYCO1 | down | CAD | up | ADAM12 | up |
| GPNMB | up | ABCA8 | down | PFDN2 | up | DENND1A | up |
| SLC52A2 | up | PCP4 | down | COL7A1 | up | APOBEC3B | up |
| NUP155 | up | PDE2A | down | VRK1 | up | CST2 | up |
| SAC3D1 | up | SLC30A4 | down | CENPF | up | TMEM185B | up |
| DTL | up | MGST2 | down | DNAJC2 | up | CEP55 | up |
| CHEK1 | up | PHACTR2 | down | DNA2 | up | CST1 | up |
| KIF20A | up | SCIN | down | CBS | up | WNT2 | up |
| NEK2 | up | CYP4B1 | down | CDCA8 | up | HMGB3 | up |
| HOXC10 | up | FMO2 | down | CDT1 | up | CENPE | up |
| PLOD1 | up | RMND5B | down | LPCAT1 | up | MCM5 | up |
| UBE2O | up | ACTL6A | up | GINS1 | up | RAD54L | up |

**Table S3** M0 macrophage-related genes obtained by Spearman’s correlation analysis

| Cell | Gene | cor | pvalue |
| --- | --- | --- | --- |
| Macrophages M0 | MMP9 | 0.698654303 | 6.31E-12 |
| Macrophages M0 | ADAM12 | 0.614976291 | 7.10E-09 |
| Macrophages M0 | COL5A3 | 0.595067652 | 2.82E-08 |
| Macrophages M0 | PXDN | 0.574356495 | 1.08E-07 |
| Macrophages M0 | DCSTAMP | 0.570894968 | 1.34E-07 |
| Macrophages M0 | CTSV | 0.56972658 | 1.44E-07 |
| Macrophages M0 | MMP8 | 0.566267292 | 1.77E-07 |
| Macrophages M0 | LINC01614 | 0.564139814 | 2.02E-07 |
| Macrophages M0 | LINC01929 | 0.55893569 | 2.76E-07 |
| Macrophages M0 | IKBIP | 0.554170062 | 3.65E-07 |
| Macrophages M0 | SULF2 | 0.539940787 | 8.23E-07 |
| Macrophages M0 | AC134312.5 | 0.538691898 | 8.82E-07 |
| Macrophages M0 | EVA1A | 0.535712131 | 1.04E-06 |
| Macrophages M0 | COL5A1 | 0.535650399 | 1.04E-06 |
| Macrophages M0 | ATP6V0D2 | 0.53262552 | 1.23E-06 |
| Macrophages M0 | COL1A1 | 0.530927885 | 1.35E-06 |
| Macrophages M0 | PDPN | 0.52969324 | 1.44E-06 |
| Macrophages M0 | HK3 | 0.524970726 | 1.86E-06 |
| Macrophages M0 | LGALS1 | 0.517161601 | 2.80E-06 |
| Macrophages M0 | MMP14 | 0.516544279 | 2.89E-06 |
| Macrophages M0 | RPLP0P2 | 0.513550267 | 3.38E-06 |
| Macrophages M0 | SLC31A2 | 0.512037828 | 3.65E-06 |
| Macrophages M0 | SNX6 | 0.511760033 | 3.70E-06 |
| Macrophages M0 | CLEC5A | 0.510031531 | 4.04E-06 |
| Macrophages M0 | ZNF469 | 0.509877201 | 4.07E-06 |
| Macrophages M0 | ADAMTS2 | 0.509568539 | 4.14E-06 |
| Macrophages M0 | TENM2 | 0.508920351 | 4.28E-06 |
| Macrophages M0 | AC109583.3 | -0.506422925 | 4.85E-06 |
| Macrophages M0 | CCL7 | 0.506076964 | 4.93E-06 |
| Macrophages M0 | RAP1GDS1 | 0.505216419 | 5.15E-06 |
| Macrophages M0 | MMP12 | 0.504444766 | 5.35E-06 |
| Macrophages M0 | DCBLD2 | 0.5044139 | 5.36E-06 |
| Macrophages M0 | S100A7A | 0.503511811 | 5.61E-06 |
| Macrophages M0 | OLFML2B | 0.503426184 | 5.63E-06 |
| Macrophages M0 | MMP10 | 0.503086657 | 5.73E-06 |
| Macrophages M0 | SPP1 | 0.502685398 | 5.84E-06 |
| Macrophages M0 | SH2D5 | 0.502315005 | 5.95E-06 |
| Macrophages M0 | ADAMTS12 | 0.501944611 | 6.06E-06 |
| Macrophages M0 | LINC02345 | 0.50163982 | 6.15E-06 |

**Table S4** Prognosis-associated M0MRGs by Cox and LASSO regression analyses

| ID | HR | HR.95L | HR.95H | pvalue |
| --- | --- | --- | --- | --- |
| ATP6V0D2 | 1.529972 | 1.128482 | 2.074303 | 0.006176 |
| MMP12 | 1.154193 | 1.016846 | 1.310091 | 0.026528 |

**Table S5** Information on patients in the high- and low-risk groups

| Id | ATP6V0D2 | MMP12 | riskScore | Risk |
| --- | --- | --- | --- | --- |
| TCGA-2H-A9GF | 1.45579031 | 5.24742798 | 0.95655756 | high |
| TCGA-2H-A9GL | 1.70112863 | 6.87196533 | 1.183705669 | high |
| TCGA-2H-A9GN | 0.9474506 | 6.6862481 | 0.913959951 | high |
| TCGA-IG-A3Y9 | 2.81125688 | 7.44934058 | 1.608093838 | high |
| TCGA-IG-A3YA | 2.2945905 | 8.2802275 | 1.508539641 | high |
| TCGA-IG-A3YC | 2.9656367 | 7.9252902 | 1.702359389 | high |
| TCGA-IG-A4P3 | 1.0100148 | 4.8773922 | 0.77383225 | high |
| TCGA-IG-A4QS | 2.01691926 | 5.50854876 | 1.168333283 | high |
| TCGA-IG-A4QT | 3.97510845 | 4.4599174 | 1.732773573 | high |
| TCGA-IG-A50L | 1.0753587 | 8.7589534 | 1.141583124 | high |
| TCGA-IG-A51D | 1.3190272 | 6.8929572 | 1.057207533 | high |
| TCGA-IG-A5B8 | 2.77864223 | 7.31062779 | 1.58477927 | high |
| TCGA-IG-A6QS | 1.73132665 | 7.91223716 | 1.286525955 | high |
| TCGA-IG-A97H | 1.46399988 | 9.92097016 | 1.375669529 | high |
| TCGA-IG-A97I | 1.466895 | 6.5493829 | 1.076276056 | high |
| TCGA-JY-A6FE | 0.77330483 | 10.04795739 | 1.154941194 | high |
| TCGA-JY-A93C | 0.9850494 | 6.2065733 | 0.88385839 | high |
| TCGA-L5-A43C | 1.34376598 | 9.1264433 | 1.264494181 | high |
| TCGA-L5-A4OG | 0.8518126 | 8.7935017 | 1.069559887 | high |
| TCGA-L5-A4OQ | 1.0405283 | 6.8946996 | 0.963800126 | high |
| TCGA-L5-A4OR | 0.7694039 | 6.43867085 | 0.832088544 | high |
| TCGA-L5-A4OS | 0.5225674 | 8.5186548 | 0.934463458 | high |
| TCGA-L5-A4OW | 1.7158404 | 7.5291338 | 1.247193598 | high |
| TCGA-L5-A4OX | 1.11248454 | 5.26265436 | 0.842579322 | high |
| TCGA-L5-A88S | 2.9659354 | 2.1643411 | 1.189231496 | high |
| TCGA-L5-A88Y | 2.7069346 | 7.0480172 | 1.537293546 | high |
| TCGA-L5-A88Z | 0.7194101 | 5.9915645 | 0.775461398 | high |
| TCGA-L5-A893 | 0.9734428 | 4.7220242 | 0.747704426 | high |
| TCGA-L5-A8NF | 0.96463871 | 5.3194095 | 0.797966194 | high |
| TCGA-L5-A8NH | 1.07836763 | 4.4544565 | 0.75911735 | high |
| TCGA-L5-A8NM | 0.84733643 | 7.78070482 | 0.977828616 | high |
| TCGA-L5-A8NN | 2.28904276 | 5.73246085 | 1.279701835 | high |
| TCGA-L5-A8NR | 0.93840882 | 5.16342128 | 0.775257583 | high |
| TCGA-L5-A8NS | 0.64589057 | 6.91194333 | 0.832756466 | high |
| TCGA-L5-A8NT | 0.79125906 | 7.24190254 | 0.910988718 | high |
| TCGA-L5-A8NV | 1.3971613 | 5.70606013 | 0.977719315 | high |
| TCGA-L5-A8NW | 1.54640745 | 3.03573185 | 0.78996633 | high |
| TCGA-LN-A49M | 0.7709822 | 5.431998 | 0.742936866 | high |
| TCGA-LN-A49N | 2.8665489 | 7.5095079 | 1.632029529 | high |
| TCGA-LN-A49O | 1.40735907 | 10.67922803 | 1.424192117 | high |
| TCGA-LN-A49P | 1.7038773 | 6.0111398 | 1.107940346 | high |
| TCGA-LN-A49R | 1.3532006 | 8.3292143 | 1.196640677 | high |
| TCGA-LN-A49U | 1.3522655 | 6.1452078 | 1.001758966 | high |
| TCGA-LN-A49W | 1.3161512 | 6.6595664 | 1.035449141 | high |
| TCGA-LN-A49X | 1.7619228 | 7.1968318 | 1.233071197 | high |
| TCGA-LN-A4A1 | 2.0768313 | 7.9676924 | 1.407539758 | high |
| TCGA-LN-A4A2 | 1.95586332 | 8.4743273 | 1.412034972 | high |
| TCGA-LN-A4A3 | 0.7808272 | 6.4441267 | 0.836412288 | high |
| TCGA-LN-A4A5 | 1.1660925 | 5.3956801 | 0.872440018 | high |
| TCGA-LN-A4A6 | 0.9920956 | 5.924338 | 0.861081962 | high |
| TCGA-LN-A4A8 | 1.48704633 | 3.80413904 | 0.838479198 | high |
| TCGA-LN-A4A9 | 2.5085421 | 9.7291767 | 1.709500577 | high |
| TCGA-LN-A5U6 | 1.80131342 | 5.86495644 | 1.127651233 | high |
| TCGA-LN-A5U7 | 0.573787 | 7.9230563 | 0.898610504 | high |
| TCGA-LN-A7HW | 0.9479634 | 7.1799463 | 0.958114539 | high |
| TCGA-LN-A7HX | 0.61572959 | 6.3322454 | 0.770979976 | high |
| TCGA-LN-A7HY | 1.01456418 | 5.46313754 | 0.827543186 | high |
| TCGA-LN-A7HZ | 0.57683817 | 7.36156071 | 0.849613346 | high |
| TCGA-LN-A9FO | 2.6126609 | 5.7294207 | 1.388151588 | high |
| TCGA-LN-A9FQ | 0.76298964 | 7.61066868 | 0.934343945 | high |
| TCGA-LN-A9FR | 2.8949107 | 5.1040082 | 1.427257946 | high |
| TCGA-M9-A5M8 | 0.53743396 | 6.26466746 | 0.738655953 | high |
| TCGA-Q9-A6FU | 0.8064805 | 5.8547211 | 0.79252196 | high |
| TCGA-Q9-A6FW | 1.6207286 | 4.4226592 | 0.938492583 | high |
| TCGA-R6-A6DQ | 1.05744082 | 6.98313957 | 0.977360834 | high |
| TCGA-R6-A6Y0 | 0.8556493 | 6.48977164 | 0.865615412 | high |
| TCGA-R6-A6Y2 | 1.51547059 | 7.95616697 | 1.217921987 | high |
| TCGA-R6-A8W5 | 0.752178 | 7.9264006 | 0.958839489 | high |
| TCGA-R6-A8W8 | 0.85322323 | 7.03259721 | 0.91315931 | high |
| TCGA-R6-A8WG | 1.18455234 | 7.30990381 | 1.049174964 | high |
| TCGA-RE-A7BO | 0.71215861 | 5.62951303 | 0.740770995 | high |
| TCGA-S8-A6BV | 1.8892682 | 6.0335802 | 1.172222194 | high |
| TCGA-V5-A7RB | 1.71157947 | 6.59954645 | 1.162947561 | high |
| TCGA-V5-A7RC | 1.335649015 | 5.399317685 | 0.929727157 | high |
| TCGA-V5-AASW | 0.69158407 | 5.80512643 | 0.749503859 | high |
| TCGA-V5-AASX | 1.14605197 | 6.66504596 | 0.978791898 | high |
| TCGA-VR-A8EQ | 0.5523396 | 7.5624732 | 0.859281751 | high |
| TCGA-VR-A8ER | 0.82250066 | 6.4281639 | 0.84899054 | high |
| TCGA-VR-A8ET | 2.0105788 | 2.4020584 | 0.889453892 | high |
| TCGA-VR-A8EU | 1.5387124 | 7.6369161 | 1.197288906 | high |
| TCGA-VR-A8EW | 1.2818108 | 5.8980002 | 0.956066381 | high |
| TCGA-VR-A8EY | 0.63724736 | 6.26939079 | 0.772609386 | high |
| TCGA-VR-A8Q7 | 1.3343794 | 3.5365193 | 0.763348676 | high |
| TCGA-VR-AA4G | 1.2990567 | 5.0712673 | 0.888208676 | high |
| TCGA-VR-AA7B | 1.20619527 | 6.12307731 | 0.950714637 | high |
| TCGA-VR-AA7D | 1.1812026 | 7.7641311 | 1.088515557 | high |
| TCGA-VR-AA7I | 1.86860855 | 7.63287324 | 1.307758448 | high |
| TCGA-Z6-A8JD | 0.8812203 | 6.638112 | 0.887421339 | high |
| TCGA-Z6-A8JE | 1.4888959 | 4.3560283 | 0.888266972 | high |
| TCGA-Z6-AAPN | 0.64978544 | 6.81104867 | 0.825076513 | high |
| TCGA-ZR-A9CJ | 1.0498961 | 4.94194995 | 0.792981791 | high |
| TCGA-2H-A9GG | 0.8137483 | 4.52390631 | 0.67640471 | low |
| TCGA-2H-A9GH | 0.60475321 | 4.34351057 | 0.590121118 | low |
| TCGA-2H-A9GI | 0.43235505 | 4.93349183 | 0.584763306 | low |
| TCGA-2H-A9GJ | 0.08069925 | 2.55172482 | 0.254437829 | low |
| TCGA-2H-A9GK | 0.4480916 | 5.6068923 | 0.65004158 | low |
| TCGA-2H-A9GM | 0.27812468 | 5.54624667 | 0.587537863 | low |
| TCGA-2H-A9GO | 0.39634781 | 2.79794817 | 0.382416423 | low |
| TCGA-2H-A9GQ | 1.14751561 | 3.30363477 | 0.679824075 | low |
| TCGA-2H-A9GR | 0.66284077 | 4.2276021 | 0.599309838 | low |
| TCGA-IC-A6RE | 0.55756308 | 5.86251757 | 0.709591891 | low |
| TCGA-IC-A6RF | 0.1953872 | 1.7155936 | 0.218478833 | low |
| TCGA-IG-A3I8 | 0.5084429 | 5.1789597 | 0.632193378 | low |
| TCGA-IG-A3QL | 0.64143909 | 4.38538815 | 0.606176628 | low |
| TCGA-IG-A3YB | 0.20372112 | 1.910532 | 0.238645205 | low |
| TCGA-IG-A5S3 | 0.27388253 | 4.15818264 | 0.462453619 | low |
| TCGA-IG-A625 | 0.48587083 | 2.37695092 | 0.37498641 | low |
| TCGA-IG-A7DP | 0.19101404 | 2.33422484 | 0.272121932 | low |
| TCGA-IG-A8O2 | 0.15617439 | 2.36105583 | 0.26280774 | low |
| TCGA-JY-A6F8 | 0.10124997 | 2.64230129 | 0.269411138 | low |
| TCGA-JY-A6FA | 0.42240339 | 3.02770781 | 0.411638582 | low |
| TCGA-JY-A6FB | 0.61767411 | 4.00673126 | 0.564459129 | low |
| TCGA-JY-A6FD | 0.23050231 | 7.00939417 | 0.701887043 | low |
| TCGA-JY-A6FH | 0.18260463 | 1.95260981 | 0.235299655 | low |
| TCGA-JY-A939 | 0.90407193 | 3.39474178 | 0.606154851 | low |
| TCGA-JY-A93D | 0.84937997 | 4.44091278 | 0.680981607 | low |
| TCGA-JY-A93E | 0.21692943 | 5.76067689 | 0.586082156 | low |
| TCGA-JY-A93F | 0.03979363 | 3.7200359 | 0.3447773 | low |
| TCGA-KH-A6WC | 0.15873735 | 2.94684556 | 0.315855286 | low |
| TCGA-L5-A43E | 0.21656078 | 4.9113341 | 0.510292527 | low |
| TCGA-L5-A43H | 0.49659718 | 5.30713218 | 0.639632328 | low |
| TCGA-L5-A43I | 0.57407336 | 4.77569771 | 0.618316569 | low |
| TCGA-L5-A43J | 0.52187445 | 6.21115162 | 0.728661094 | low |
| TCGA-L5-A43M | 0.3576207 | 3.02682935 | 0.389796361 | low |
| TCGA-L5-A4OE | 0.71561633 | 5.01418063 | 0.687114235 | low |
| TCGA-L5-A4OF | 0.4918512 | 4.81668013 | 0.59434478 | low |
| TCGA-L5-A4OH | 0.16155124 | 3.32581153 | 0.350561732 | low |
| TCGA-L5-A4OI | 0.40734328 | 4.31846924 | 0.521569727 | low |
| TCGA-L5-A4OJ | 0.46551108 | 5.5996678 | 0.6552501 | low |
| TCGA-L5-A4OM | 0.40228736 | 3.82618511 | 0.476014838 | low |
| TCGA-L5-A4ON | 0.21619204 | 3.22469221 | 0.359910029 | low |
| TCGA-L5-A4OO | 0.81592137 | 3.43509282 | 0.580135148 | low |
| TCGA-L5-A4OP | 0.34914219 | 4.43499677 | 0.512398017 | low |
| TCGA-L5-A4OT | 1.09944981 | 3.20303957 | 0.65471444 | low |
| TCGA-L5-A4OU | 0.66023933 | 4.82824096 | 0.651945257 | low |
| TCGA-L5-A88T | 0.42569307 | 5.82155039 | 0.66164006 | low |
| TCGA-L5-A88V | 0.24707667 | 3.37972854 | 0.384097614 | low |
| TCGA-L5-A88W | 0.56007122 | 5.77717258 | 0.702831342 | low |
| TCGA-L5-A891 | 0.1707214 | 4.2760301 | 0.438295023 | low |
| TCGA-L5-A8NE | 0.21040242 | 3.95368735 | 0.422909302 | low |
| TCGA-L5-A8NG | 0.44024525 | 4.68056918 | 0.564881812 | low |
| TCGA-L5-A8NI | 0.23269108 | 4.24734281 | 0.456558266 | low |
| TCGA-L5-A8NJ | 0.18486879 | 2.78274464 | 0.310014898 | low |
| TCGA-L5-A8NK | 0.54456541 | 3.68107083 | 0.510885762 | low |
| TCGA-L5-A8NL | 1.1238487 | 3.5799364 | 0.696488104 | low |
| TCGA-L5-A8NQ | 0.44443541 | 5.25724135 | 0.617663761 | low |
| TCGA-L5-A8NU | 0.28809062 | 2.91554782 | 0.356523712 | low |
| TCGA-L7-A56G | 0.23669506 | 5.48854764 | 0.568479185 | low |
| TCGA-L7-A6VZ | 0.6731099 | 5.6864132 | 0.732721541 | low |
| TCGA-LN-A49K | 0.53321635 | 4.88804205 | 0.614598991 | low |
| TCGA-LN-A49L | 0.7718951 | 3.1507975 | 0.540017232 | low |
| TCGA-LN-A49S | 0.0936287 | 2.92165095 | 0.291737295 | low |
| TCGA-LN-A49V | 0.20011993 | 2.89143864 | 0.324821841 | low |
| TCGA-LN-A49Y | 0.686217 | 2.07277652 | 0.415195253 | low |
| TCGA-LN-A4A4 | 0.63194436 | 5.40459573 | 0.693785442 | low |
| TCGA-LN-A4MQ | 0.60148104 | 4.26360313 | 0.581903072 | low |
| TCGA-LN-A4MR | 0.4045486 | 5.4586027 | 0.622202423 | low |
| TCGA-LN-A5U5 | 0.18147119 | 4.58148745 | 0.469118866 | low |
| TCGA-LN-A7HV | 0.41002524 | 3.65196764 | 0.463093815 | low |
| TCGA-LN-A8HZ | 0.57912221 | 4.43170729 | 0.589367519 | low |
| TCGA-LN-A8I0 | 0.3528299 | 4.5550861 | 0.524335367 | low |
| TCGA-LN-A8I1 | 0.40056207 | 6.33314474 | 0.698773851 | low |
| TCGA-LN-A9FP | 0.31539794 | 2.75590865 | 0.351475851 | low |
| TCGA-R6-A6DN | 0.3588437 | 6.6067564 | 0.70913379 | low |
| TCGA-R6-A6KZ | 0.49104178 | 5.95738035 | 0.695694921 | low |
| TCGA-R6-A6L4 | 0.16894294 | 3.64534297 | 0.381511238 | low |
| TCGA-R6-A6L6 | 0.12190045 | 5.93048021 | 0.569284197 | low |
| TCGA-R6-A6XG | 0.15758459 | 3.653596 | 0.378430604 | low |
| TCGA-R6-A6XQ | 0.06532708 | 3.16383459 | 0.303804793 | low |
| TCGA-R6-A8WC | 0.22879758 | 5.35832025 | 0.554224375 | low |
| TCGA-S8-A6BW | 1.05710184 | 3.50481255 | 0.667371682 | low |
| TCGA-V5-A7RE | 0.22464894 | 4.36754759 | 0.464565219 | low |
| TCGA-V5-AASV | 0.4752672 | 6.1565477 | 0.708138709 | low |
| TCGA-VR-A8EO | 0.56910219 | 3.85621394 | 0.534732027 | low |
| TCGA-VR-A8EP | 0.72927772 | 4.85735546 | 0.677732671 | low |
| TCGA-VR-A8EX | 0.09510268 | 3.85148584 | 0.375069099 | low |
| TCGA-VR-A8EZ | 0.2528381 | 5.538293 | 0.57833418 | low |
| TCGA-VR-AA4D | 0.18599952 | 4.35559803 | 0.450516262 | low |
| TCGA-X8-AAAR | 0.33078466 | 2.18765765 | 0.306021041 | low |
| TCGA-XP-A8T6 | 0.12636143 | 3.40316875 | 0.345631155 | low |
| TCGA-XP-A8T8 | 0.49043442 | 4.35927877 | 0.553120089 | low |
| TCGA-Z6-A9VB | 0.67941295 | 5.02145049 | 0.675599242 | low |

**Table S6** Clinical Characteristics of the Sample Used to Create the Nomogram

| ID | Gender | Stage | futime | fustat | ATP6V0D2 | MMP12 | riskScore | Risk | Nomogram |
| --- | --- | --- | --- | --- | --- | --- | --- | --- | --- |
| TCGA-2H-A9GF | MALE | Stage III-IV | 2.15 | 1 | 1.46 | 5.25 | 0.96 | high | 4.47 |
| TCGA-2H-A9GG | MALE | Stage III-IV | 1.67 | 1 | 0.81 | 4.52 | 0.68 | low | 2.85 |
| TCGA-2H-A9GH | MALE | Stage I-II | 2.61 | 1 | 0.60 | 4.34 | 0.59 | low | 1.07 |
| TCGA-2H-A9GI | MALE | Stage III-IV | 1.19 | 1 | 0.43 | 4.93 | 0.58 | low | 2.85 |
| TCGA-2H-A9GJ | MALE | Stage I-II | 4.88 | 1 | 0.08 | 2.55 | 0.25 | low | 1.07 |
| TCGA-2H-A9GK | MALE | Stage III-IV | 0.64 | 1 | 0.45 | 5.61 | 0.65 | low | 2.85 |
| TCGA-2H-A9GL | MALE | Stage III-IV | 0.49 | 1 | 1.70 | 6.87 | 1.18 | high | 4.47 |
| TCGA-2H-A9GM | MALE | Stage I-II | 1.16 | 1 | 0.28 | 5.55 | 0.59 | low | 1.07 |
| TCGA-2H-A9GN | MALE | Stage III-IV | 0.75 | 1 | 0.95 | 6.69 | 0.91 | high | 4.47 |
| TCGA-2H-A9GO | MALE | Stage III-IV | 1.35 | 1 | 0.40 | 2.80 | 0.38 | low | 2.85 |
| TCGA-2H-A9GQ | MALE | Stage III-IV | 0.35 | 1 | 1.15 | 3.30 | 0.68 | low | 2.85 |
| TCGA-2H-A9GR | MALE | Stage I-II | 2.70 | 1 | 0.66 | 4.23 | 0.60 | low | 1.07 |
| TCGA-IC-A6RE | MALE | Stage I-II | 0.64 | 0 | 0.56 | 5.86 | 0.71 | low | 1.07 |
| TCGA-IC-A6RF | FEMALE | Stage I-II | 1.31 | 0 | 0.20 | 1.72 | 0.22 | low | 0.64 |
| TCGA-IG-A3I8 | FEMALE | Stage I-II | 2.77 | 0 | 0.51 | 5.18 | 0.63 | low | 0.64 |
| TCGA-IG-A3QL | MALE | Stage I-II | 2.93 | 0 | 0.64 | 4.39 | 0.61 | low | 1.07 |
| TCGA-IG-A3Y9 | MALE | Stage III-IV | 0.07 | 1 | 2.81 | 7.45 | 1.61 | high | 4.47 |
| TCGA-IG-A3YA | MALE | Stage III-IV | 1.73 | 0 | 2.29 | 8.28 | 1.51 | high | 4.47 |
| TCGA-IG-A3YB | MALE | Stage III-IV | 0.22 | 0 | 0.20 | 1.91 | 0.24 | low | 2.85 |
| TCGA-IG-A3YC | MALE | Stage III-IV | 1.68 | 0 | 2.97 | 7.93 | 1.70 | high | 4.47 |
| TCGA-IG-A4P3 | MALE | Stage I-II | 1.55 | 1 | 1.01 | 4.88 | 0.77 | high | 1.67 |
| TCGA-IG-A4QS | MALE | Stage III-IV | 0.32 | 1 | 2.02 | 5.51 | 1.17 | high | 4.47 |
| TCGA-IG-A4QT | MALE | Stage I-II | 0.78 | 1 | 3.98 | 4.46 | 1.73 | high | 1.67 |
| TCGA-IG-A50L | MALE | Stage III-IV | 0.04 | 0 | 1.08 | 8.76 | 1.14 | high | 4.47 |
| TCGA-IG-A51D | MALE | Stage I-II | 1.42 | 0 | 1.32 | 6.89 | 1.06 | high | 1.67 |
| TCGA-IG-A5B8 | MALE | Stage I-II | 0.07 | 1 | 2.78 | 7.31 | 1.58 | high | 1.67 |
| TCGA-IG-A5S3 | FEMALE | Stage I-II | 1.95 | 0 | 0.27 | 4.16 | 0.46 | low | 0.64 |
| TCGA-IG-A625 | MALE | Stage III-IV | 1.07 | 1 | 0.49 | 2.38 | 0.37 | low | 2.85 |
| TCGA-IG-A6QS | MALE | Stage I-II | 0.83 | 1 | 1.73 | 7.91 | 1.29 | high | 1.67 |
| TCGA-IG-A7DP | FEMALE | Stage III-IV | 1.24 | 0 | 0.19 | 2.33 | 0.27 | low | 1.70 |
| TCGA-IG-A8O2 | MALE | Stage III-IV | 0.39 | 1 | 0.16 | 2.36 | 0.26 | low | 2.85 |
| TCGA-IG-A97H | MALE | Stage I-II | 1.21 | 0 | 1.46 | 9.92 | 1.38 | high | 1.67 |
| TCGA-IG-A97I | MALE | Stage I-II | 1.01 | 0 | 1.47 | 6.55 | 1.08 | high | 1.67 |
| TCGA-JY-A6F8 | MALE | Stage I-II | 10.18 | 0 | 0.10 | 2.64 | 0.27 | low | 1.07 |
| TCGA-JY-A6FA | MALE | Stage I-II | 3.73 | 1 | 0.42 | 3.03 | 0.41 | low | 1.07 |
| TCGA-JY-A6FB | MALE | Stage I-II | 5.03 | 0 | 0.62 | 4.01 | 0.56 | low | 1.07 |
| TCGA-JY-A6FD | FEMALE | Stage I-II | 5.67 | 0 | 0.23 | 7.01 | 0.70 | low | 0.64 |
| TCGA-JY-A6FE | MALE | Stage III-IV | 0.31 | 1 | 0.77 | 10.05 | 1.15 | high | 4.47 |
| TCGA-JY-A6FH | MALE | Stage I-II | 3.95 | 0 | 0.18 | 1.95 | 0.24 | low | 1.07 |
| TCGA-JY-A939 | MALE | Stage I-II | 1.81 | 0 | 0.90 | 3.39 | 0.61 | low | 1.07 |
| TCGA-JY-A93C | MALE | Stage III-IV | 1.93 | 0 | 0.99 | 6.21 | 0.88 | high | 4.47 |
| TCGA-JY-A93D | MALE | Stage III-IV | 2.63 | 1 | 0.85 | 4.44 | 0.68 | low | 2.85 |
| TCGA-JY-A93E | MALE | Stage III-IV | 2.10 | 0 | 0.22 | 5.76 | 0.59 | low | 2.85 |
| TCGA-JY-A93F | FEMALE | Stage I-II | 2.00 | 0 | 0.04 | 3.72 | 0.34 | low | 0.64 |
| TCGA-KH-A6WC | MALE | Stage I-II | 0.52 | 0 | 0.16 | 2.95 | 0.32 | low | 1.07 |
| TCGA-L5-A43E | MALE | Stage I-II | 2.52 | 0 | 0.22 | 4.91 | 0.51 | low | 1.07 |
| TCGA-L5-A43H | MALE | Stage III-IV | 0.02 | 1 | 0.50 | 5.31 | 0.64 | low | 2.85 |
| TCGA-L5-A43I | MALE | Stage III-IV | 1.52 | 1 | 0.57 | 4.78 | 0.62 | low | 2.85 |
| TCGA-L5-A43J | MALE | Stage I-II | 0.00 | 1 | 0.52 | 6.21 | 0.73 | low | 1.07 |
| TCGA-L5-A4OE | MALE | Stage III-IV | 2.00 | 1 | 0.72 | 5.01 | 0.69 | low | 2.85 |
| TCGA-L5-A4OF | MALE | Stage I-II | 2.19 | 1 | 0.49 | 4.82 | 0.59 | low | 1.07 |
| TCGA-L5-A4OG | FEMALE | Stage I-II | 0.39 | 0 | 0.85 | 8.79 | 1.07 | high | 1.00 |
| TCGA-L5-A4OH | MALE | Stage I-II | 2.72 | 0 | 0.16 | 3.33 | 0.35 | low | 1.07 |
| TCGA-L5-A4OI | MALE | Stage III-IV | 1.67 | 0 | 0.41 | 4.32 | 0.52 | low | 2.85 |
| TCGA-L5-A4OJ | FEMALE | Stage I-II | 1.75 | 0 | 0.47 | 5.60 | 0.66 | low | 0.64 |
| TCGA-L5-A4OM | FEMALE | Stage I-II | 3.99 | 1 | 0.40 | 3.83 | 0.48 | low | 0.64 |
| TCGA-L5-A4ON | MALE | Stage I-II | 1.53 | 1 | 0.22 | 3.22 | 0.36 | low | 1.07 |
| TCGA-L5-A4OO | MALE | Stage III-IV | 0.28 | 0 | 0.82 | 3.44 | 0.58 | low | 2.85 |
| TCGA-L5-A4OP | FEMALE | Stage I-II | 0.60 | 0 | 0.35 | 4.43 | 0.51 | low | 0.64 |
| TCGA-L5-A4OQ | MALE | Stage III-IV | 0.12 | 1 | 1.04 | 6.89 | 0.96 | high | 4.47 |
| TCGA-L5-A4OR | MALE | Stage I-II | 0.26 | 1 | 0.77 | 6.44 | 0.83 | high | 1.67 |
| TCGA-L5-A4OS | FEMALE | Stage I-II | 3.48 | 0 | 0.52 | 8.52 | 0.93 | high | 1.00 |
| TCGA-L5-A4OT | MALE | Stage III-IV | 0.41 | 1 | 1.10 | 3.20 | 0.65 | low | 2.85 |
| TCGA-L5-A4OU | MALE | Stage I-II | 2.42 | 0 | 0.66 | 4.83 | 0.65 | low | 1.07 |
| TCGA-L5-A4OW | FEMALE | Stage I-II | 0.59 | 1 | 1.72 | 7.53 | 1.25 | high | 1.00 |
| TCGA-L5-A4OX | MALE | Stage I-II | 0.62 | 1 | 1.11 | 5.26 | 0.84 | high | 1.67 |
| TCGA-L5-A88S | MALE | Stage I-II | 1.29 | 0 | 2.97 | 2.16 | 1.19 | high | 1.67 |
| TCGA-L5-A88T | MALE | Stage I-II | 1.90 | 0 | 0.43 | 5.82 | 0.66 | low | 1.07 |
| TCGA-L5-A88V | MALE | Stage III-IV | 0.22 | 0 | 0.25 | 3.38 | 0.38 | low | 2.85 |
| TCGA-L5-A88W | MALE | Stage I-II | 2.09 | 1 | 0.56 | 5.78 | 0.70 | low | 1.07 |
| TCGA-L5-A88Z | FEMALE | Stage I-II | 0.62 | 0 | 0.72 | 5.99 | 0.78 | high | 1.00 |
| TCGA-L5-A893 | FEMALE | Stage I-II | 0.25 | 0 | 0.97 | 4.72 | 0.75 | high | 1.00 |
| TCGA-L5-A8NE | MALE | Stage I-II | 4.62 | 0 | 0.21 | 3.95 | 0.42 | low | 1.07 |
| TCGA-L5-A8NF | MALE | Stage III-IV | 0.22 | 1 | 0.96 | 5.32 | 0.80 | high | 4.47 |
| TCGA-L5-A8NG | MALE | Stage III-IV | 3.00 | 0 | 0.44 | 4.68 | 0.56 | low | 2.85 |
| TCGA-L5-A8NH | MALE | Stage III-IV | 1.08 | 1 | 1.08 | 4.45 | 0.76 | high | 4.47 |
| TCGA-L5-A8NI | MALE | Stage III-IV | 1.12 | 1 | 0.23 | 4.25 | 0.46 | low | 2.85 |
| TCGA-L5-A8NJ | MALE | Stage III-IV | 1.37 | 0 | 0.18 | 2.78 | 0.31 | low | 2.85 |
| TCGA-L5-A8NK | FEMALE | Stage I-II | 1.13 | 0 | 0.54 | 3.68 | 0.51 | low | 0.64 |
| TCGA-L5-A8NL | MALE | Stage III-IV | 1.10 | 0 | 1.12 | 3.58 | 0.70 | low | 2.85 |
| TCGA-L5-A8NM | FEMALE | Stage I-II | 0.65 | 1 | 0.85 | 7.78 | 0.98 | high | 1.00 |
| TCGA-L5-A8NN | MALE | Stage III-IV | 0.46 | 0 | 2.29 | 5.73 | 1.28 | high | 4.47 |
| TCGA-L5-A8NQ | MALE | Stage I-II | 1.78 | 1 | 0.44 | 5.26 | 0.62 | low | 1.07 |
| TCGA-L5-A8NR | FEMALE | Stage III-IV | 0.73 | 0 | 0.94 | 5.16 | 0.78 | high | 2.67 |
| TCGA-L5-A8NS | MALE | Stage I-II | 1.12 | 0 | 0.65 | 6.91 | 0.83 | high | 1.67 |
| TCGA-L5-A8NT | MALE | Stage I-II | 2.26 | 0 | 0.79 | 7.24 | 0.91 | high | 1.67 |
| TCGA-L5-A8NU | MALE | Stage I-II | 5.85 | 1 | 0.29 | 2.92 | 0.36 | low | 1.07 |
| TCGA-L5-A8NV | MALE | Stage I-II | 4.38 | 1 | 1.40 | 5.71 | 0.98 | high | 1.67 |
| TCGA-L7-A6VZ | MALE | Stage III-IV | 0.86 | 0 | 0.67 | 5.69 | 0.73 | low | 2.85 |
| TCGA-LN-A49K | MALE | Stage I-II | 0.49 | 1 | 0.53 | 4.89 | 0.61 | low | 1.07 |
| TCGA-LN-A49L | MALE | Stage I-II | 0.87 | 1 | 0.77 | 3.15 | 0.54 | low | 1.07 |
| TCGA-LN-A49M | MALE | Stage I-II | 1.05 | 0 | 0.77 | 5.43 | 0.74 | high | 1.67 |
| TCGA-LN-A49N | MALE | Stage I-II | 1.04 | 0 | 2.87 | 7.51 | 1.63 | high | 1.67 |
| TCGA-LN-A49O | MALE | Stage I-II | 1.12 | 0 | 1.41 | 10.68 | 1.42 | high | 1.67 |
| TCGA-LN-A49P | MALE | Stage I-II | 1.03 | 0 | 1.70 | 6.01 | 1.11 | high | 1.67 |
| TCGA-LN-A49R | MALE | Stage III-IV | 1.12 | 0 | 1.35 | 8.33 | 1.20 | high | 4.47 |
| TCGA-LN-A49S | MALE | Stage I-II | 1.10 | 0 | 0.09 | 2.92 | 0.29 | low | 1.07 |
| TCGA-LN-A49U | MALE | Stage I-II | 1.28 | 0 | 1.35 | 6.15 | 1.00 | high | 1.67 |
| TCGA-LN-A49V | MALE | Stage I-II | 1.05 | 0 | 0.20 | 2.89 | 0.32 | low | 1.07 |
| TCGA-LN-A49W | MALE | Stage III-IV | 1.10 | 0 | 1.32 | 6.66 | 1.04 | high | 4.47 |
| TCGA-LN-A49X | MALE | Stage I-II | 1.05 | 0 | 1.76 | 7.20 | 1.23 | high | 1.67 |
| TCGA-LN-A49Y | MALE | Stage I-II | 1.04 | 0 | 0.69 | 2.07 | 0.42 | low | 1.07 |
| TCGA-LN-A4A1 | MALE | Stage I-II | 1.05 | 0 | 2.08 | 7.97 | 1.41 | high | 1.67 |
| TCGA-LN-A4A2 | MALE | Stage I-II | 1.04 | 0 | 1.96 | 8.47 | 1.41 | high | 1.67 |
| TCGA-LN-A4A3 | MALE | Stage III-IV | 1.06 | 0 | 0.78 | 6.44 | 0.84 | high | 4.47 |
| TCGA-LN-A4A4 | MALE | Stage III-IV | 1.05 | 0 | 0.63 | 5.40 | 0.69 | low | 2.85 |
| TCGA-LN-A4A5 | MALE | Stage I-II | 1.87 | 1 | 1.17 | 5.40 | 0.87 | high | 1.67 |
| TCGA-LN-A4A6 | MALE | Stage I-II | 1.07 | 0 | 0.99 | 5.92 | 0.86 | high | 1.67 |
| TCGA-LN-A4A8 | MALE | Stage I-II | 1.29 | 0 | 1.49 | 3.80 | 0.84 | high | 1.67 |
| TCGA-LN-A4A9 | MALE | Stage I-II | 0.96 | 1 | 2.51 | 9.73 | 1.71 | high | 1.67 |
| TCGA-LN-A4MQ | MALE | Stage III-IV | 1.03 | 0 | 0.60 | 4.26 | 0.58 | low | 2.85 |
| TCGA-LN-A4MR | MALE | Stage I-II | 1.10 | 0 | 0.40 | 5.46 | 0.62 | low | 1.07 |
| TCGA-LN-A5U5 | MALE | Stage III-IV | 0.37 | 1 | 0.18 | 4.58 | 0.47 | low | 2.85 |
| TCGA-LN-A5U6 | MALE | Stage I-II | 1.03 | 0 | 1.80 | 5.86 | 1.13 | high | 1.67 |
| TCGA-LN-A5U7 | MALE | Stage I-II | 2.10 | 0 | 0.57 | 7.92 | 0.90 | high | 1.67 |
| TCGA-LN-A7HV | MALE | Stage I-II | 0.88 | 0 | 0.41 | 3.65 | 0.46 | low | 1.07 |
| TCGA-LN-A7HW | MALE | Stage I-II | 1.00 | 0 | 0.95 | 7.18 | 0.96 | high | 1.67 |
| TCGA-LN-A7HX | MALE | Stage I-II | 1.02 | 0 | 0.62 | 6.33 | 0.77 | high | 1.67 |
| TCGA-LN-A7HY | MALE | Stage III-IV | 1.00 | 0 | 1.01 | 5.46 | 0.83 | high | 4.47 |
| TCGA-LN-A7HZ | MALE | Stage I-II | 1.10 | 0 | 0.58 | 7.36 | 0.85 | high | 1.67 |
| TCGA-LN-A8HZ | MALE | Stage I-II | 1.03 | 0 | 0.58 | 4.43 | 0.59 | low | 1.07 |
| TCGA-LN-A8I0 | MALE | Stage I-II | 1.12 | 0 | 0.35 | 4.56 | 0.52 | low | 1.07 |
| TCGA-LN-A8I1 | FEMALE | Stage I-II | 1.10 | 0 | 0.40 | 6.33 | 0.70 | low | 0.64 |
| TCGA-LN-A9FO | MALE | Stage I-II | 0.01 | 0 | 2.61 | 5.73 | 1.39 | high | 1.67 |
| TCGA-LN-A9FP | FEMALE | Stage I-II | 1.00 | 0 | 0.32 | 2.76 | 0.35 | low | 0.64 |
| TCGA-LN-A9FQ | MALE | Stage I-II | 1.07 | 0 | 0.76 | 7.61 | 0.93 | high | 1.67 |
| TCGA-LN-A9FR | MALE | Stage I-II | 1.02 | 0 | 2.89 | 5.10 | 1.43 | high | 1.67 |
| TCGA-M9-A5M8 | MALE | Stage I-II | 2.76 | 0 | 0.54 | 6.26 | 0.74 | high | 1.67 |
| TCGA-Q9-A6FU | FEMALE | Stage III-IV | 0.43 | 1 | 0.81 | 5.85 | 0.79 | high | 2.67 |
| TCGA-Q9-A6FW | MALE | Stage III-IV | 0.65 | 0 | 1.62 | 4.42 | 0.94 | high | 4.47 |
| TCGA-R6-A8W5 | MALE | Stage III-IV | 1.32 | 1 | 0.75 | 7.93 | 0.96 | high | 4.47 |
| TCGA-RE-A7BO | FEMALE | Stage I-II | 0.58 | 1 | 0.71 | 5.63 | 0.74 | high | 1.00 |
| TCGA-S8-A6BV | MALE | Stage III-IV | 1.67 | 0 | 1.89 | 6.03 | 1.17 | high | 4.47 |
| TCGA-S8-A6BW | MALE | Stage I-II | 1.70 | 0 | 1.06 | 3.50 | 0.67 | low | 1.07 |
| TCGA-V5-A7RE | MALE | Stage I-II | 1.37 | 0 | 0.22 | 4.37 | 0.46 | low | 1.07 |
| TCGA-V5-AASV | MALE | Stage I-II | 1.28 | 0 | 0.48 | 6.16 | 0.71 | low | 1.07 |
| TCGA-VR-A8EO | MALE | Stage I-II | 2.15 | 0 | 0.57 | 3.86 | 0.53 | low | 1.07 |
| TCGA-VR-A8EP | MALE | Stage III-IV | 2.26 | 0 | 0.73 | 4.86 | 0.68 | low | 2.85 |
| TCGA-VR-A8EQ | MALE | Stage III-IV | 1.90 | 1 | 0.55 | 7.56 | 0.86 | high | 4.47 |
| TCGA-VR-A8ER | MALE | Stage III-IV | 1.04 | 1 | 0.82 | 6.43 | 0.85 | high | 4.47 |
| TCGA-VR-A8ET | MALE | Stage I-II | 0.13 | 1 | 2.01 | 2.40 | 0.89 | high | 1.67 |
| TCGA-VR-A8EU | MALE | Stage III-IV | 1.53 | 1 | 1.54 | 7.64 | 1.20 | high | 4.47 |
| TCGA-VR-A8EW | MALE | Stage III-IV | 0.68 | 1 | 1.28 | 5.90 | 0.96 | high | 4.47 |
| TCGA-VR-A8EX | MALE | Stage III-IV | 2.34 | 1 | 0.10 | 3.85 | 0.38 | low | 2.85 |
| TCGA-VR-A8EY | FEMALE | Stage I-II | 2.81 | 0 | 0.64 | 6.27 | 0.77 | high | 1.00 |
| TCGA-VR-A8EZ | MALE | Stage III-IV | 1.52 | 1 | 0.25 | 5.54 | 0.58 | low | 2.85 |
| TCGA-VR-A8Q7 | MALE | Stage III-IV | 4.36 | 0 | 1.33 | 3.54 | 0.76 | high | 4.47 |
| TCGA-VR-AA4D | MALE | Stage I-II | 3.85 | 1 | 0.19 | 4.36 | 0.45 | low | 1.07 |
| TCGA-VR-AA4G | FEMALE | Stage III-IV | 1.50 | 0 | 1.30 | 5.07 | 0.89 | high | 2.67 |
| TCGA-VR-AA7B | FEMALE | Stage III-IV | 0.94 | 0 | 1.21 | 6.12 | 0.95 | high | 2.67 |
| TCGA-VR-AA7D | MALE | Stage III-IV | 0.76 | 1 | 1.18 | 7.76 | 1.09 | high | 4.47 |
| TCGA-VR-AA7I | MALE | Stage III-IV | 1.33 | 1 | 1.87 | 7.63 | 1.31 | high | 4.47 |
| TCGA-XP-A8T6 | MALE | Stage I-II | 2.09 | 1 | 0.13 | 3.40 | 0.35 | low | 1.07 |
| TCGA-XP-A8T8 | FEMALE | Stage I-II | 1.20 | 0 | 0.49 | 4.36 | 0.55 | low | 1.07 |
| TCGA-Z6-A8JD | MALE | Stage I-II | 0.28 | 0 | 0.88 | 6.64 | 0.89 | high | 1.67 |
| TCGA-Z6-A8JE | MALE | Stage I-II | 0.18 | 0 | 1.49 | 4.36 | 0.89 | high | 4.47 |
| TCGA-Z6-A9VB | MALE | Stage III-IV | 0.11 | 0 | 0.68 | 5.02 | 0.68 | low | 2.85 |
| TCGA-Z6-AAPN | MALE | Stage III-IV | 0.22 | 0 | 0.65 | 6.81 | 0.83 | high | 1.67 |
| TCGA-ZR-A9CJ | MALE | Stage III-IV | 1.64 | 1 | 1.05 | 4.94 | 0.79 | high | 4.47 |


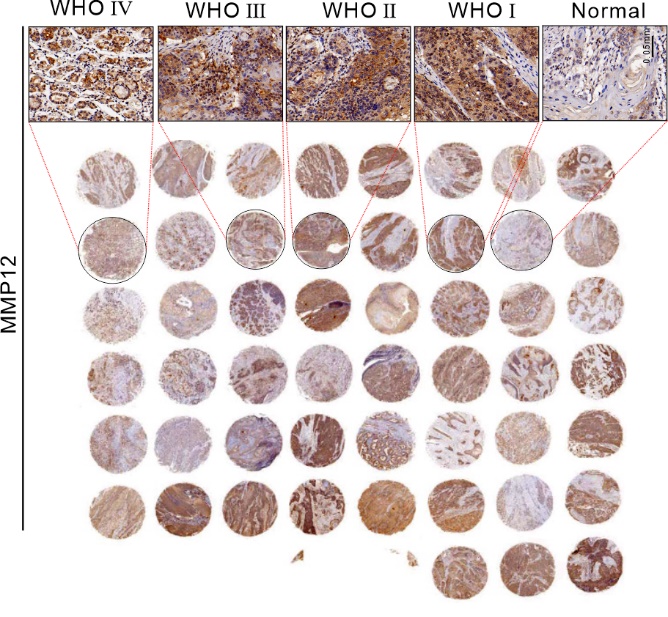


**Figure S1** The expression of MMP12 in ESCA. The expression of MMP12 was detected by tissue microarray and immunohistochemical staining. N: Normal (n = 3), I: WHO I (n = 5), II: WHO II (n = 12), Ⅲ: WHO Ⅲ (n = 14). Ⅳ: WHO Ⅳ (n = 14)


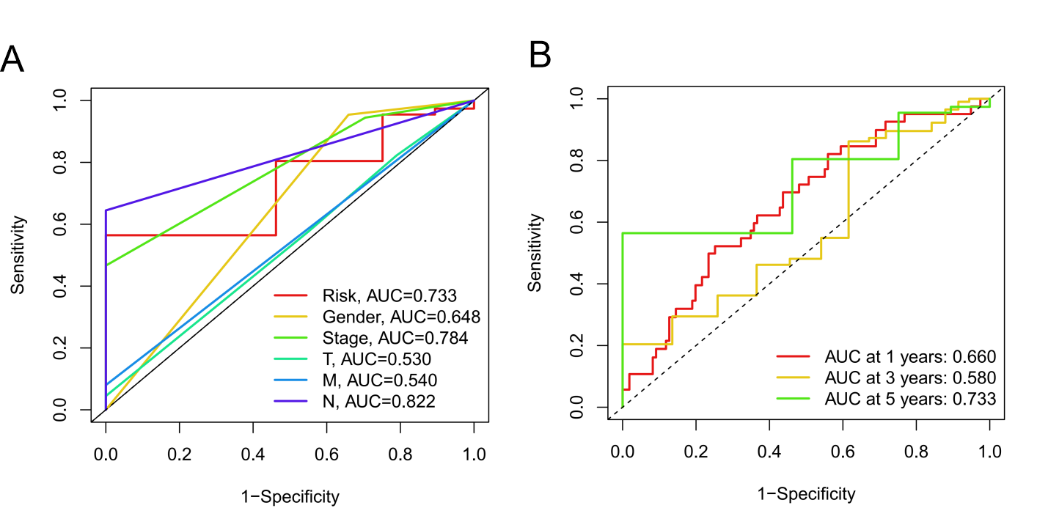


**Figure S2. Receiver Operating Characteristic (ROC) Curve Analysis.** (A) The ROC curve analysis illustrates the area under the curve (AUC) for gender, tumor stage, TNM stage, and the risk score model. (B) The AUC curves show the prognostic performance of the risk score model at 1-, 2-, and 3-year survival time points.
